# Supplementary material
Source: PubMed Central journal article supplement (PMC9799177)
Supplement: mmbr.00124-21-s0001.pdf [file mmbr.00124-21-s0001.pdf]

## Supplementary Table 1A

## Previous phage 21 sequence determinations

| Accession No. | bp   | location            | number of differences<br>from 21 sequence |
|---------------|------|---------------------|-------------------------------------------|
| M81255        | 8134 | head genes          | 5                                         |
| M23775        | 1688 | head genes          | 5                                         |
| AJ237660      | 4890 | <i>cro-nin</i>      | 14                                        |
| DQ372054      | 625  | <i>cI-cII</i>       | 0                                         |
| M58702        | 995  | <i>Q</i>            | 0                                         |
| M65239        | 1285 | lysis               | 24                                        |
| AH001308      | 191  | early left operator | 1                                         |
| AH007390      | 949  | <i>N</i>            | 29                                        |
| M61865        | 2910 | <i>int-att</i>      | 0                                         |
| AF017628      | 1349 | <i>int</i>          | 20                                        |
| EU078592      | 1909 | <i>N-cI-cro</i>     | 0                                         |

## Supplementary Table 1B

## Previous phage 434 sequence determinations

| Accession No. | bp   | location                          | number of differences<br>from 434 sequence |
|---------------|------|-----------------------------------|--------------------------------------------|
| M12904        | 970  | <i>cI</i> region                  | 4                                          |
| Y00118        | 286  | <i>cI</i> fragment                | 0                                          |
| M12803        | 67   | early left operator               | 0                                          |
| X73093        | 116  | early right operator              | 0                                          |
| J02460        | 360  | <i>cro</i> , early right operator | 0                                          |
| V00635        | 873  | <i>cII-oop</i>                    | 0                                          |
| M60848        | 2616 | <i>int</i>                        | 0                                          |

## Supplementary Table 2A

Phage 21 patches of genome similarity to  $\lambda$ 

| Current analysis |                  |                                        |
|------------------|------------------|----------------------------------------|
| Coordinates      | Percent identity | Simon & Davis coordinates <sup>a</sup> |
| 1-8030           | 60.4%            | 1-8000 <sup>b</sup>                    |
| 8030-18130       | 95.7%            | 8000-18100                             |
| 19220-19620      | 82.5%            | <sup>c</sup>                           |
| 29680-33660      | 97.5%            | 29200-33200                            |
| 35520-38020      | 97.9%            | 35100-37700                            |
| 38020-38990      | 97.6%            | 37800-38700                            |
| 40590-41335      | 97.9%            | 40600-41500                            |

## Supplementary Table 2B

Phage 434 patches of genome similarity to  $\lambda$ 

| Current analysis |                    |                                        |
|------------------|--------------------|----------------------------------------|
| Coordinates      | Percent identity   | Simon & Davis coordinates <sup>a</sup> |
| 1-18455          | 98.1%              | 1-17950                                |
| 19508-20001      | 91.5               | 19100-19600                            |
| 24826-26401      | 95.1%              | 24600-26500                            |
| 26842-27088      | 95.2%              | ~2700 (short)                          |
| 28061-31744      | 97.6%              | 28000-31700                            |
| 32712-33200      | 92.5%              | 32900-33300                            |
| 33968-34006      | 89.7%              | 34100-34100                            |
| 34685-37522      | 97.9%              | 34800-37700                            |
| 38056-39715      | 97.4% <sup>d</sup> | 38300-39900                            |
| 46454-47207      | 97.5%              | 46600-47500                            |
| 47595-47993      | 96.0%              | 47700-47993                            |

## Table S2 footnotes

- Calculated to three significant figures from the data reported in Simon *et al.* (1971), adjusting for their measurements of the 434 and 21 chromosomes to be about 48050 and 43400 bp long, respectively.
- The region from 1-8000 gave variable heteroduplex in the presence of 40% formamide but heteroduplex was never observed in 60% formamide.
- Short interval of moderately high or high similarity that was not observed in the reported heteroduplex analysis.
- Value ignores a 185 bp insertion in  $\lambda$  DNA in this interval.

## Supplementary Table S3A

## Point differences between 434 and 434B

| Gene      | Coordinate (bp) | 434 | 434B | 434 | 434B | Codon |
|-----------|-----------------|-----|------|-----|------|-------|
|           |                 | Nt  | Nt   | AA  | AA   |       |
| <i>C</i>  | 3970            | A   | G    | Q   | R    | 379   |
| <i>I</i>  | 15193           | T   | C    | S   | P    | 108   |
| <i>J</i>  | 18652           | G   | A    | D   | N    | 1050  |
| <i>J</i>  | 18847           | C   | T    | R   | W    | 1116  |
| <i>cl</i> | 34178           | A   | C    | L   | R    | 61    |

## Supplementary Table S3B

Point differences between  $\lambda$  DNA and  $\lambda$  portion of  $\lambda$  *imm434*

| Gene                 | Coordinate ( $\lambda$ bp) | $\lambda$ | $\lambda$ <i>imm434</i> | $\lambda$ | $\lambda$ <i>imm434</i> | Codon |
|----------------------|----------------------------|-----------|-------------------------|-----------|-------------------------|-------|
|                      |                            | Nt        | Nt                      | AA        | AA                      |       |
| Left of <i>NuI</i>   | 138                        | G         | $\Delta^a$              | –         | –                       | –     |
| <i>K<sup>c</sup></i> | 14266-7                    | $\Delta$  | $G^a$                   | –         | –                       | –     |
| <i>stf/orf401</i>    | 20661                      | A         | $G^a$                   | K         | E                       | 338   |
| <i>tfa/orf194</i>    | 22444                      | A         | $G^a$                   | K         | E                       | 158   |
| <i>ea59</i>          | 25662                      | T         | $C^a$                   | M         | V                       | 438   |
| <i>orf63</i>         | 31016                      | T         | $C^a$                   | N         | D                       | 61    |
| <i>exo</i>           | 31966                      | A         | $T^a$                   | D         | E                       | 21    |
| <i>sieB</i>          | 34934                      | A         | $G^a$                   | G         | G                       | 150   |
| <i>R</i>             | 45618                      | T         | $C^a$                   | F         | F                       | 42    |

## Supplementary Table S3C

Point differences between  $\lambda$  DNA and  $\lambda$  portion of  $\lambda$  *imm21*

| Gene                 | Coordinate ( $\lambda$ bp) | $\lambda$ | $\lambda$ <i>imm21</i> | $\lambda$ | $\lambda$ <i>imm21</i> | Codon   |
|----------------------|----------------------------|-----------|------------------------|-----------|------------------------|---------|
|                      |                            | Nt        | Nt                     | AA        | AA                     |         |
| Left of <i>NuI</i>   | 138                        | G         | $\Delta^a$             | –         | –                      | –       |
| <i>A</i>             | 1864-1875                  | 12 bp     | $\Delta$               | EHYS      | $\Delta$               | 383-386 |
| <i>K<sup>c</sup></i> | 14266-7                    | $\Delta$  | $G^a$                  | –         | –                      | –       |
| <i>J</i>             | 17183                      | A         | G                      | E         | G                      | 560     |
| <i>stf/orf401</i>    | 19805                      | T         | $\Delta^b$             | D         | fs                     | 52      |
| <i>stf/orf401</i>    | 20661                      | A         | $G^a$                  | K         | E                      | 338     |
| <i>stf/orf401</i>    | 20832-3                    | $\Delta$  | $C^b$                  | P         | fs                     | 396     |
| <i>stf/orf401</i>    | 22444                      | A         | $G^a$                  | K         | E                      | 158     |
| <i>ea59</i>          | 25662                      | T         | $C^a$                  | M         | V                      | 438     |
| <i>orf63</i>         | 31016                      | T         | $C^a$                  | N         | D                      | 61      |
| <i>exo</i>           | 31966                      | A         | $T^a$                  | D         | E                      | 21      |
| <i>R</i>             | 45618                      | T         | $C^a$                  | F         | F                      | 42      |

## Supplementary Table S3D

Point differences between 434 DNA and 434 portion of  $\lambda$  *h434 imm21*

| Gene        | Coordinate (434 bp) | $\lambda$ <i>imm21</i> |                    | $\lambda$ <i>imm21</i> |                   | Codon |
|-------------|---------------------|------------------------|--------------------|------------------------|-------------------|-------|
|             |                     | 434<br>Nt              | <i>h4343</i><br>Nt | 434<br>AA              | <i>h434</i><br>AA |       |
| <i>J</i>    | 18651               | G                      | A                  | D                      | N                 | 1050  |
| <i>J</i>    | 18847               | C                      | T                  | R                      | W                 | 1114  |
| <i>nleB</i> | 21678               | G                      | A                  | V                      | I                 | 5     |

## Supplementary Table S3E

Point differences between  $\lambda$  DNA and  $\lambda$  portion of  $\lambda$  *h434 imm21*

| Gene                  | Coordinate ( $\lambda$ bp) | $\lambda$ <i>imm21</i> |                    | $\lambda$ <i>imm21</i> |                   | Codon |
|-----------------------|----------------------------|------------------------|--------------------|------------------------|-------------------|-------|
|                       |                            | $\lambda$<br>Nt        | <i>h4343</i><br>Nt | $\lambda$<br>AA        | <i>h434</i><br>AA |       |
| Left of <i>NuI</i>    | 138                        | G                      | $\Delta^a$         | –                      | –                 | –     |
| <i>K</i> <sup>c</sup> | 14266-7                    | $\Delta$               | $G^a$              | –                      | –                 | –     |
| <i>orf63</i>          | 31016                      | T                      | $C^a$              | N                      | D                 | 61    |
| <i>exo</i>            | 31966                      | A                      | $T^a$              | D                      | E                 | 21    |
| <i>R</i>              | 45618                      | T                      | $C^a$              | F                      | F                 | 42    |

## Table S3 footnotes

- These differences from the Sanger *et al.* (1982)  $\lambda$  sequence (Genbank Accession No. J02459) are present in all three of the hybrid phage genome sequences, except for the  $\lambda$ *imm434* difference at 34934 which is replaced by 21 DNA in the  $\lambda$ *imm21* hybrids.
- Curiously, the  $\lambda$  *imm21 stf* gene does not carry the frameshift (deletion of one C) that is present at bp 20833 in most laboratory  $\lambda$  strains (Hendrix & Duda 1992), but it has a different frameshift at bp 19805 ( $\lambda$  coordinates).
- The gene *K* start is incorrectly annotated in Accession No. J02459, and this is a frameshift error in that sequence (A. Davidson, personal communication).

Figure S1

## Phage 21 genome

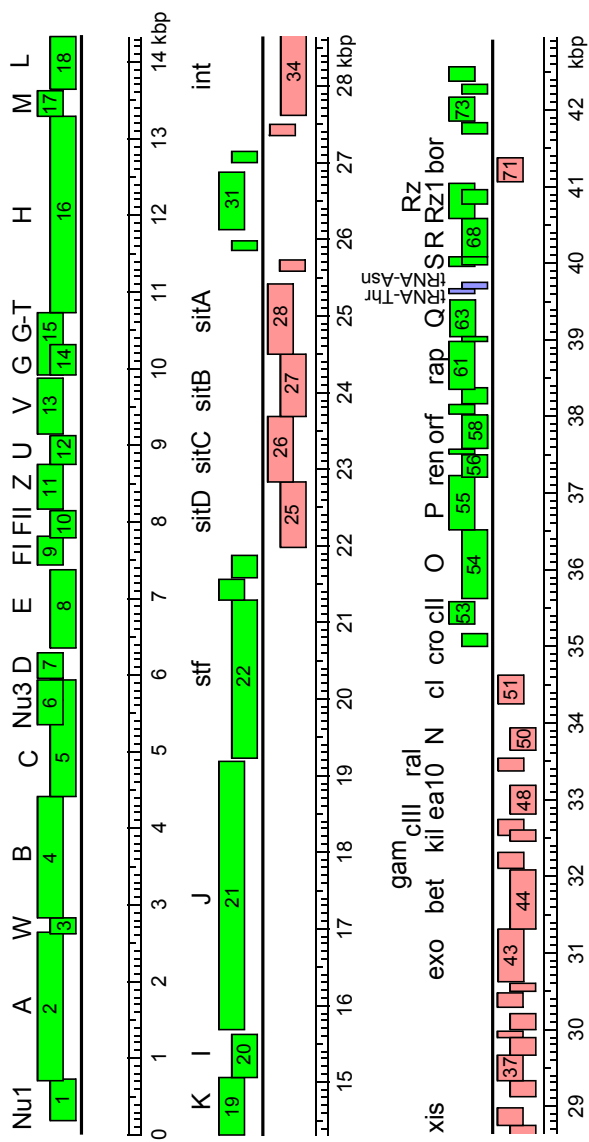

**Figure S1. Map of the phage 21 genome**

Colored boxes indicate predicted genes; green genes are transcribed left to right and red ones right to left; blue boxes are tRNA genes transcribed rightwards. Selected 21 gene numbers are indicated on the genes and other names including phage  $\lambda$  homologue names are shown above the genes. The genome is shown as a physical map of the virion chromosome, and a kbp scale is shown below the map.

## Figure S2

### Phage 21 gpFII mosaic boundary

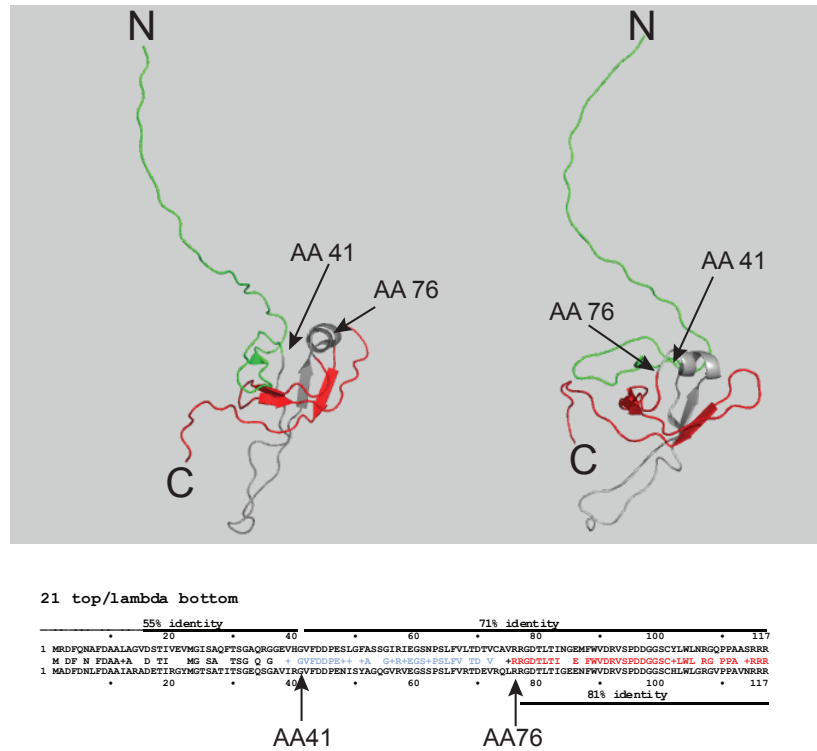

**Figure S2. Phage 21 gpFII mosaic boundary**

Two views of a ribbon diagram of the lambda gpFII protein are shown above (Maxwell *et al.*, 2002); AAs 1-40 are green; 41-76 gray; 77-C-terminus red. An alignment of the two proteins is shown below.

The differential similarity boundary discussed in the text between low and high lambda-21 similarity is at AA 41. AA 41 lies near the boundary between the extended N-terminal region and the compactly folded domain that makes up the rest of the gpFII structure.

Figure S3

## Phage 434 genome

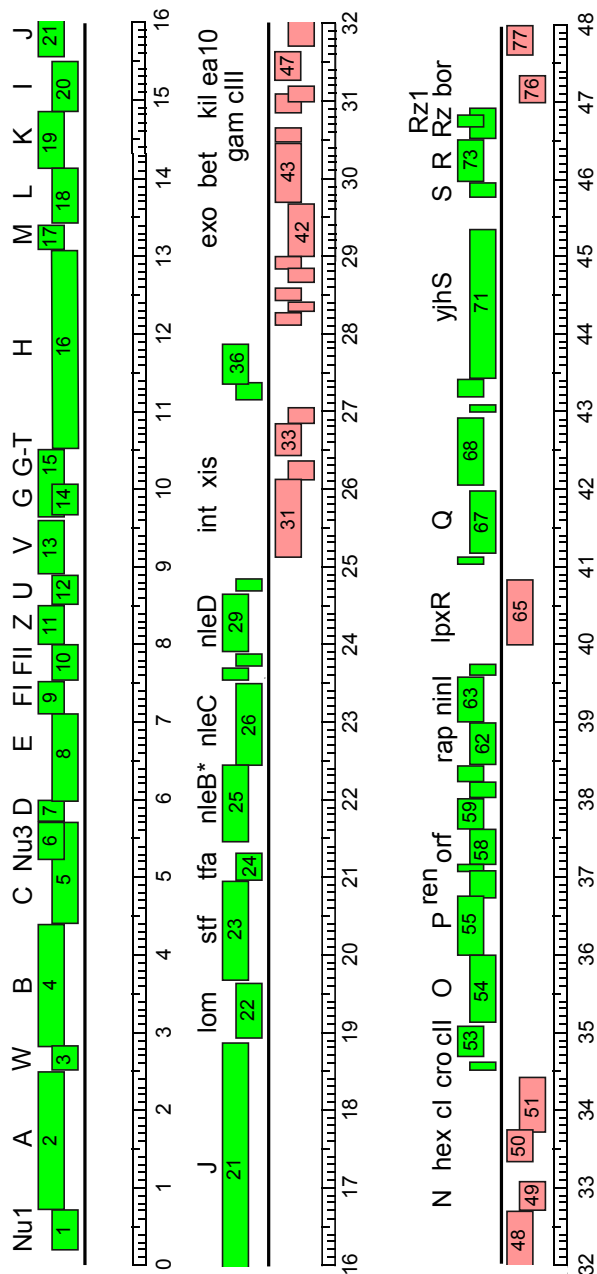

Figure S3. Map of the phage 434 genome

Colored boxes indicate predicted genes; green genes are transcribed left to right and red ones right to left. Selected 434 gene numbers are indicated on the gene and other names including phage  $\lambda$  homologue names are shown above the genes. The asterisk (\*) indicates that the gene apparently has a broken reading frame. The genome is shown as a physical map of the virion chromosome, and a kbp scale is shown below the map.

## Figure S4

### 434 top – lambda bottom

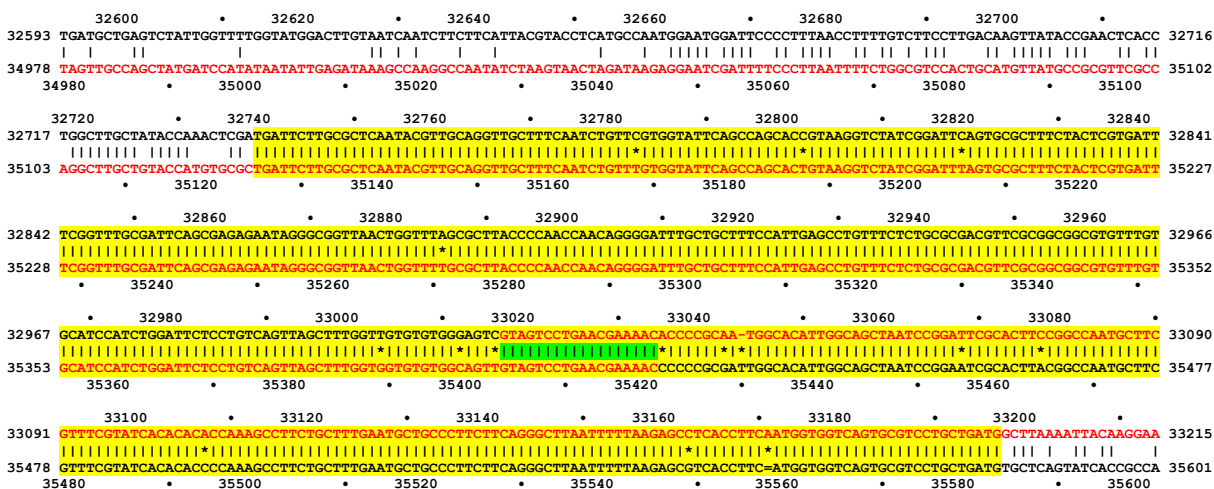

**Figure S4. Location of the left crossover point in the generation of  $\lambda$  *imm434***

The aligned sequences of the 434 (above) and  $\lambda$  (below) regions immediately to the left of their nonhomologous immunity regions are shown. The 459 bp section of high similarity is highlighted in yellow, and the 15 single nucleotide differences in this region are marked by asterisks (\*). The red nucleotides correspond to the  $\lambda$  *imm434* sequence determined in this study. The recombination event that created the left end of the 434 DNA in  $\lambda$  *imm434* must have happened within the region of identity highlighted in green.



Figure S5 Differences from original phage  $\lambda$  genome sequence

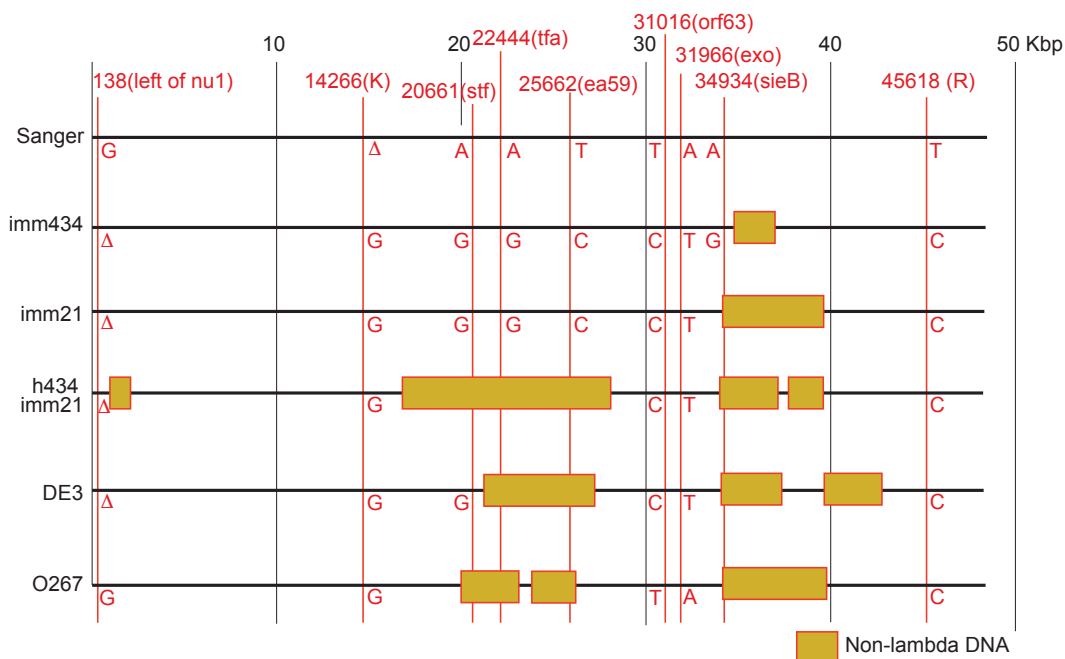

**Figure S5. Differences from original phage  $\lambda$  genome sequence.**

The nine uniform differences between the three  $\lambda$  hybrids sequenced in this report and the original phage  $\lambda$  genome sequence (Acc. No. J02459) are indicated by vertical red lines and associated nucleotides in red text. In addition, the nucleotides at these locations in the sequenced  $\lambda$  DE3 cloning vector (Acc. No. EU078592) and HK022 hybrid O276 (Acc. No. MH547045) are shown below. Two of these nucleotides at bp 138 and 14266 were found carry the hybrid phage nucleotides in  $\lambda$  phages used in the laboratories of M. Feiss (unpublished) and A. Davidson (personal communication), respectively. The latter is a frameshift in the esentail gene *K*, and so may be an error in the original  $\lambda$  sequence; the nucleotide at 45818 in gene *R* was found to be the same as the original  $\lambda$  sequence in phage  $\lambda$  in the laboratory of R. Young (unpublihsed).

SUPPLEMENTARY MATERIAL REFERENCES

Hendrix, R.W. and R.L. Duda, *Bacteriophage lambda PaPa: not the mother of all lambda phages*. Science, 1992. **258**:1145-8.

Maxwell, K., A. Yee, C. Arrowsmith, M. Gold, and A. Davidson, *The solution structure of the bacteriophage lambda head-tail joining protein, gpFII*. Journal of Molecular Biology, 2002. **318**:1395-1404.

Sanger, F., et al., *Nucleotide sequence of bacteriophage  $\lambda$  DNA*. Journal of Molecular Biology, 1982. **162**:729-773.

Simon, M.N., R.W. Davis, and N. Davidson, *Heteroduplexes of DNA molecules of lambdoid phages: Physical mapping of their base sequence relationships by electron microscopy*, in *The Bacteriophage Lambda*, A.D.-. Hershey, Editor. 1971, Cold Spring Harbor Press: Cold Spring Harbor, New York. pp313-328.
